# Supplementary material for: Assessment of the intramolecular magnetic interactions in the highly saddled iron(iii) porphyrin π-radical cations: the change from planar to saddle conformations
Source: Royal Society of Chemistry journal article supplement (doi:10.1039/c9dt02714a), 2019-01-01
Supplement: c9dt02714a1.pdf [file c9dt02714a1.pdf]

## Electronic Supporting Information

Assessment of the Intramolecular Magnetic Interactions in the Highly  
Iron(III) Porphyrin  $\pi$ - Radical Cations: Change From Planar to saddled  
conformations

Ching-Chin Chen,<sup>†,‡</sup> Yi-Wen Wu,<sup>†,‡</sup> Mikio Nakamura<sup>‡</sup>, Ru-Jen Cheng,<sup>†</sup>  
Tzu-Hsien Tseng<sup>†</sup> and Peter Ping-Yu Chen<sup>\*,†</sup>

<sup>†</sup> Department of Chemistry, National Chung Hsing University, Taichung City 402,  
Taiwan (R.O.C.)

<sup>‡</sup> Department of Chemistry, Faculty of Science, Toho University, Funabashi 274-8510,  
and Research Center for Materials with Integrated Properties, Toho University,  
Funabashi 274-8510, Japan

Correspondence to: [pychen@dragon.nchu.edu.tw](mailto:pychen@dragon.nchu.edu.tw)

|                                                                                                                                                                                                                                                                                                    |     |
|----------------------------------------------------------------------------------------------------------------------------------------------------------------------------------------------------------------------------------------------------------------------------------------------------|-----|
| <b>Table S1.</b> Crystal data and structure refinement for [Fe(OETPP•)Cl][SbCl <sub>6</sub> ] .....                                                                                                                                                                                                | S4  |
| <b>Table S2.</b> Crystal data and structure refinement for [Fe(OMTPP•)Cl][SbCl <sub>6</sub> ] .....                                                                                                                                                                                                | S5  |
| <b>Fig. S1.</b> Absorption spectral changes of (a) Fe(OMTPP)Cl and (b) Fe(OETPP)Cl upon one-electron oxidation with 1.2 equiv of (Phox+•)SbCl <sub>6</sub> in a solution of dichloromethane at room temperature. ....                                                                              | S6  |
| <b>Fig. S2.</b> Variable-Temperature visible spectra of [Fe(OETPP)Cl][SbCl <sub>6</sub> ] at 30 °C – -70 °C in CH <sub>2</sub> Cl <sub>2</sub> . ....                                                                                                                                              | S6  |
| <b>Fig. S3.</b> Deviations of the core atoms from the average plane of magnetic data of 24 porphyrin atoms in unit of 10 <sup>-2</sup> Å together with the Fe-N <sub>p</sub> bond length (Å) for [Fe(OETPP•)Cl][SbCl <sub>6</sub> ] <b>1</b> and [Fe(OETPP•)Cl][SbCl <sub>6</sub> ] <b>2</b> ..... | S7  |
| <b>Table S3</b> Selected Molecular orbital energies (eV) and compositions (α-set and β-set) for [Fe(OETPP•)Cl] <sup>+</sup> (S = 2) .....                                                                                                                                                          | S7  |
| <b>Table S4.</b> Calculated effective orbital interactions between P <sup>-1</sup> and FeCl <sup>2+</sup> fragments for [Fe(TPP•)Cl] <sup>+</sup> , [Fe(OMTPP•)Cl] <sup>+</sup> and [Fe(OETPP•)Cl] <sup>+</sup> .....                                                                              | S8  |
| <b>Fig. S4.</b> (a) The occupied α-set d <sub>x<sup>2</sup>-y<sup>2</sup>-a<sub>2u</sub></sub> MO, and (b) the unoccupied β-set d <sub>x<sup>2</sup>-y<sup>2</sup>-a<sub>2u</sub></sub> MO in the ferromagnetic spin state (S = 1) calculation .....                                               | S10 |
| <b>Fig. S5.</b> Selected α-set molecular orbitals based on spin-unrestricted calculations for [Fe(TPP•)Cl] <sup>+</sup> .....                                                                                                                                                                      | S10 |
| <b><u>Equations for paramagnetic <sup>1</sup>H NMR shifts</u></b> .....                                                                                                                                                                                                                            | S11 |
| <b>Fig. S6.</b> Correlation between the calculated Fermi contact spin densities at each symmetry-distinct hydrogen atom and the experimental isotropic shifts of [Fe(OETPP•)Cl][SbCl <sub>6</sub> ] .....                                                                                          | S14 |
| <b>Fig. S7.</b> Observed VT <sup>1</sup> H NMR spectra of [Fe(TPP•)Cl][SbCl <sub>6</sub> ] in CD <sub>2</sub> Cl <sub>2</sub> .....                                                                                                                                                                | S15 |
| <b>Fig. S8.</b> <sup>1</sup> H NMR of Fe(OETPP)Cl and [Fe(OETPP•)Cl][SbCl <sub>6</sub> ] .....                                                                                                                                                                                                     | S16 |

|                                                                                                                                                                           |     |
|---------------------------------------------------------------------------------------------------------------------------------------------------------------------------|-----|
| <b>Fig. S9.</b> $^1\text{H}$ NMR of $[\text{Fe}(\text{OETPP})\text{Cl}][\text{SbCl}_6]$ and $[\text{Fe}(\text{OETp-CH}_3\text{PP}\bullet)\text{Cl}][\text{SbCl}_6]$ ..... | S17 |
| <b>Table S5.</b> Theoretically calculated paramagnetic shift of $[\text{Fe}(\text{OETPP}\bullet)\text{Cl}][\text{SbCl}_6]$ .....                                          | S18 |
| <b>Table S6.</b> Crystal data and structure refinement for $[\text{Fe}(\text{OET}(p\text{-CH}_3)\text{PP}\bullet)\text{Cl}][\text{SbCl}_6]$ .....                         | S19 |
| <b>Fig. S10.</b> ORTEP diagram of $[\text{Fe}(\text{OET}(p\text{-CH}_3)\text{PP}\bullet)\text{Cl}][\text{SbCl}_6]$ .....                                                  | S20 |
| Cartesian coordinates of $[\text{Fe}(\text{TPP}\bullet)\text{Cl}]^+$ for calculation .....                                                                                | S21 |
| Cartesian coordinates of $\text{Fe}(\text{OETPP})\text{Cl}$ for calculation .....                                                                                         | S22 |
| Cartesian coordinates of $[\text{Fe}(\text{OETPP}\bullet)\text{Cl}]^+$ for calculation .....                                                                              | S24 |
| Cartesian coordinates of $\text{Cu}(\text{OETPP}\bullet)\text{ClO}_4$ for calculation .....                                                                               | S26 |
| References .....                                                                                                                                                          | S29 |

**Table S1.** Crystal data and structure refinement for [Fe(OETPP•)Cl][SbCl<sub>6</sub>].

|                                   |                                             |                  |
|-----------------------------------|---------------------------------------------|------------------|
| Identification code               | feoetppsbc16                                |                  |
| Empirical formula                 | C61 H62 Cl9 Fe N4 Sb                        |                  |
| Formula weight                    | 1347.79                                     |                  |
| Temperature                       | 150(2) K                                    |                  |
| Wavelength                        | 0.71076 Å                                   |                  |
| Crystal system                    | Monoclinic                                  |                  |
| Space group                       | P2 <sub>1</sub> /n                          |                  |
| Unit cell dimensions              | a = 17.4501(8) Å                            | α = 90°.         |
|                                   | b = 18.5354(10) Å                           | β = 106.174(2)°. |
|                                   | c = 21.6356(12) Å                           | γ = 90°.         |
| Volume                            | 6720.9(6) Å <sup>3</sup>                    |                  |
| Z                                 | 4                                           |                  |
| Density (calculated)              | 1.332 Mg/m <sup>3</sup>                     |                  |
| Absorption coefficient            | 1.014 mm <sup>-1</sup>                      |                  |
| F(000)                            | 2744                                        |                  |
| Crystal size                      | 0.21 x 0.18 x 0.095 mm <sup>3</sup>         |                  |
| Theta range for data collection   | 2.852 to 25.999°.                           |                  |
| Index ranges                      | -21 ≤ h ≤ 21, -22 ≤ k ≤ 22, -26 ≤ l ≤ 26    |                  |
| Reflections collected             | 216615                                      |                  |
| Independent reflections           | 13176 [R(int) = 0.0427]                     |                  |
| Completeness to theta = 25.243°   | 99.7 %                                      |                  |
| Refinement method                 | Full-matrix least-squares on F <sup>2</sup> |                  |
| Data / restraints / parameters    | 13176 / 299 / 637                           |                  |
| Goodness-of-fit on F <sup>2</sup> | 1.075                                       |                  |
| Final R indices [I > 2σ(I)]       | R1 = 0.0799, wR2 = 0.2894                   |                  |
| R indices (all data)              | R1 = 0.0950, wR2 = 0.3407                   |                  |
| Extinction coefficient            | n/a                                         |                  |
| Largest diff. peak and hole       | 4.181 and -1.790 e.Å <sup>-3</sup>          |                  |

**Table S2.** Crystal data and structure refinement for [Fe(OMTPP•)Cl][SbCl<sub>6</sub>].

|                                   |                                                                                                                                                  |
|-----------------------------------|--------------------------------------------------------------------------------------------------------------------------------------------------|
| Identification code               | [Fe(OMTPP)Cl][SbCl <sub>6</sub> ]                                                                                                                |
| Empirical formula                 | C <sub>52</sub> H <sub>44</sub> Cl <sub>7</sub> Fe N <sub>4</sub> Sb                                                                             |
| Formula weight                    | 1150.66                                                                                                                                          |
| Temperature                       | 150(2) K                                                                                                                                         |
| Wavelength                        | 0.71073 Å                                                                                                                                        |
| Crystal system                    | Orthorhombic                                                                                                                                     |
| Space group                       | Cmc2 <sub>1</sub>                                                                                                                                |
| Unit cell dimensions              | a = 16.944(2) Å                      α = 90°.<br>b = 34.231(5) Å                      β = 90°.<br>c = 9.7978(11) Å                      γ = 90°. |
| Volume                            | 5682.8(12) Å <sup>3</sup>                                                                                                                        |
| Z                                 | 4                                                                                                                                                |
| Density (calculated)              | 1.345 Mg/m <sup>3</sup>                                                                                                                          |
| Absorption coefficient            | 1.095 mm <sup>-1</sup>                                                                                                                           |
| F(000)                            | 2320                                                                                                                                             |
| Crystal size                      | 0.4 x 0.4 x 0.4 mm <sup>3</sup>                                                                                                                  |
| Theta range for data collection   | 2.992 to 26.000°.                                                                                                                                |
| Index ranges                      | -20 ≤ h ≤ 20, -42 ≤ k ≤ 42, -12 ≤ l ≤ 12                                                                                                         |
| Reflections collected             | 76685                                                                                                                                            |
| Independent reflections           | 5780 [R(int) = 0.0390]                                                                                                                           |
| Completeness to theta = 25.242°   | 99.7 %                                                                                                                                           |
| Absorption correction             | Semi-empirical from equivalents                                                                                                                  |
| Max. and min. transmission        | 26.403 and 2.9615                                                                                                                                |
| Refinement method                 | Full-matrix least-squares on F <sup>2</sup>                                                                                                      |
| Data / restraints / parameters    | 5780 / 1 / 309                                                                                                                                   |
| Goodness-of-fit on F <sup>2</sup> | 1.045                                                                                                                                            |
| Final R indices [I > 2σ(I)]       | R1 = 0.0368, wR2 = 0.1213                                                                                                                        |
| R indices (all data)              | R1 = 0.0390, wR2 = 0.1244                                                                                                                        |
| Absolute structure parameter      | 0.01(2)                                                                                                                                          |
| Extinction coefficient            | n/a                                                                                                                                              |
| Largest diff. peak and hole       | 2.639 and -1.062 e.Å <sup>-3</sup>                                                                                                               |

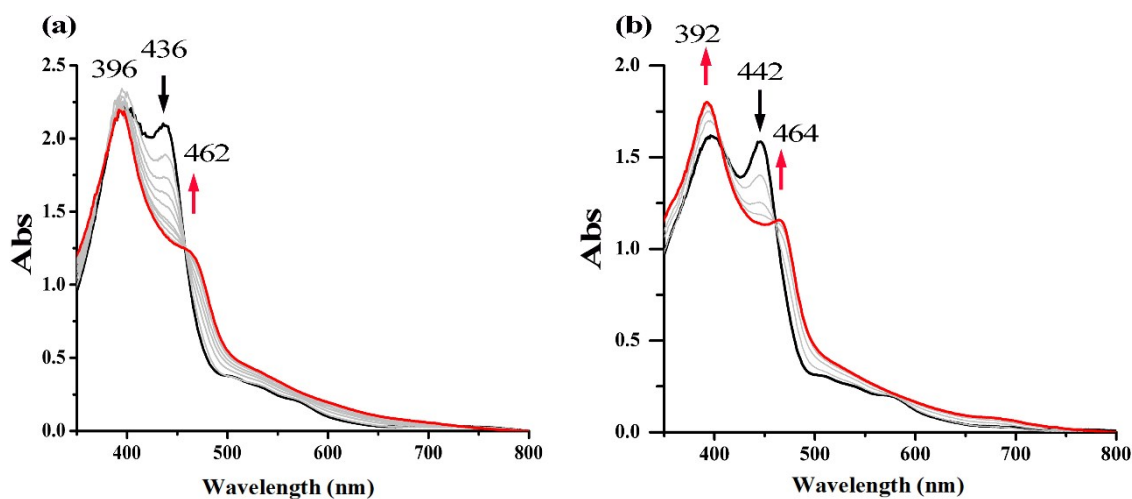

**Fig. S1.** Absorption spectral changes of (a) Fe(OMTPP)Cl and (b) Fe(OETPP)Cl upon one-electron oxidation with 1.2 equiv of (Phox<sup>+</sup>)SbCl<sub>6</sub> in a solution of dichloromethane at room temperature.

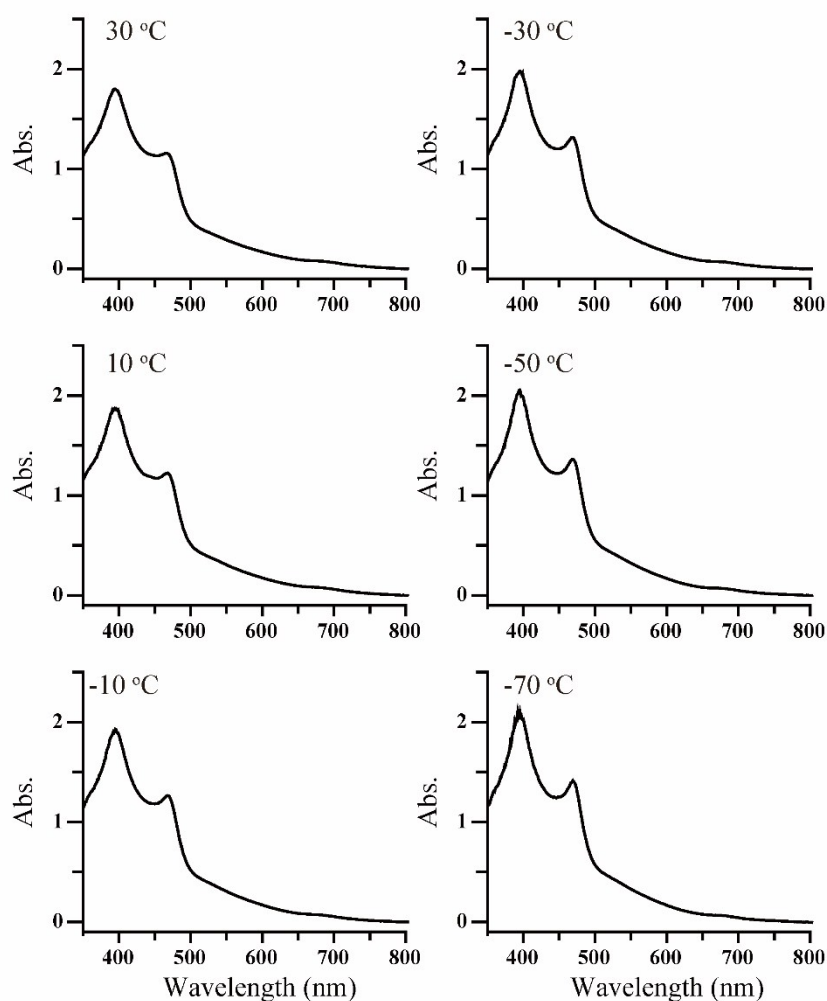

**Fig. S2.** Variable-Temperature visible spectra of [Fe(OETPP)Cl][SbCl<sub>6</sub>] at 30 °C - -70

°C in CH<sub>2</sub>Cl<sub>2</sub>.

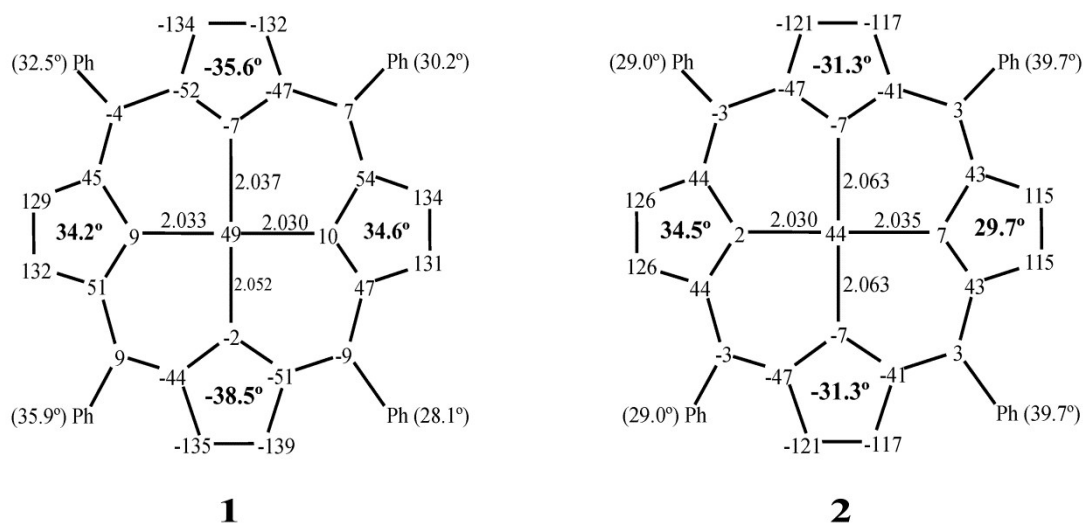

**Fig. S3.** Deviations of the core atoms from the average plane of 24 porphyrin atoms in unit of  $10^{-2}$  Å together with the Fe-N<sub>p</sub> bond length (Å) for [Fe(OETPP•)Cl][SbCl<sub>6</sub>] **1** and [Fe(OETPP•)Cl][SbCl<sub>6</sub>] **2**. The angle (°) described in each pyrrole ring is the dihedral angle between the pyrrole and the mean porphyrin plane.

**Table 3.** Selected Molecular orbital energies (eV) and compositions ( $\alpha$ -set and  $\beta$ -set) for [Fe(OETPP•)Cl]<sup>+</sup> (*S* = 2).

| Orb Energy(eV)                                          | Orb.                           | Occ | Primary Contributors SFO (percent)                                                        |
|---------------------------------------------------------|--------------------------------|-----|-------------------------------------------------------------------------------------------|
| Symmetry Representation for Spin- $\alpha$ -A1 symmetry |                                |     |                                                                                           |
| -8.140                                                  | $a_{2u} + d_{x^2-y^2}(\alpha)$ | 1   | C15(1P:z)(16.36) Cl2(1P:z)(14.12) C15(1P:x)(13.39)<br>Fe1(1D:z2)(12.66) C23(1P:z)(7.94)   |
| -7.669                                                  | $d_{z^2}(\alpha)$              | 1   | N4(1P:z)(18.32) Fe1(1D:x2-y2)(17.76)<br>C23(1P:z)(10.46) Cl2(1P:z)(8.07) Fe1(1D:z2)(7.52) |
| -6.734                                                  | $d_{x^2-y^2} - a_{2u}(\alpha)$ | 0   | C23(1P:z)(21.81) Fe1(1D:x2-y2)(20.67)<br>N3(1P:x)(15.91) N4(1P:y)(12.01)                  |
| Symmetry Representation for Spin- $\beta$ -A1 symmetry  |                                |     |                                                                                           |
| -7.754                                                  | $a_{2u} + d_{x^2-y^2}(\beta)$  | 1   | C23(1P:z)(33.33) C15(1P:z)(5.96) N4(1P:z)(5.64)                                           |
| -6.042                                                  | $d_{z^2}(\beta)$               | 0   | Fe1(1D:z2)(59.79) Cl2(1P:z)(15.38) C23(1P:z)(5.10)                                        |
| -5.275                                                  | $d_{x^2-y^2}(\beta)$           | 0   | Fe1(1D:x2-y2)(59.55) N4(1P:y)(8.71) N3(1P:x)(7.65)                                        |
| Symmetry Representation for Spin- $\alpha$ -A2 symmetry |                                |     |                                                                                           |
| -10.856                                                 | $d_{xy}(\alpha)$               | 1   | Fe1(1D:xy)(53.91)                                                                         |
| Symmetry Representation for Spin- $\beta$ -A2 symmetry  |                                |     |                                                                                           |
| -7.319                                                  | $d_{xy}(\beta)$                | 0   | Fe1(1D:xy)(66.68) C9(1P:y)(5.93) C7(1P:z)(5.86)                                           |
| Symmetry Representation for Spin- $\alpha$ -B1 symmetry |                                |     |                                                                                           |
| -9.995                                                  | $d_{xz}(\alpha)$               | 1   | Cl2(1P:x)(15.08) N3(1P:x)(13.83) Fe1(1D:xz)(8.62)<br>C23(1P:z)(8.56)                      |
| Symmetry Representation for Spin- $\beta$ -B1 symmetry  |                                |     |                                                                                           |
| -6.559                                                  | $d_{xz}(\beta)$                | 0   | Fe1(1D:xz)(75.44) Cl2(1P:x)(10.43)                                                        |
| Symmetry Representation for Spin- $\alpha$ -B2 symmetry |                                |     |                                                                                           |
| -10.635                                                 | $d_{yz}(\alpha)$               | 1   | Fe1(1D:yz)(20.36) Cl2(1P:y)(7.64) H71(1S)(6.47)<br>H91(1S)(5.05)                          |
| Symmetry Representation for Spin- $\beta$ -B2 symmetry  |                                |     |                                                                                           |

|        |                 |   |                                    |
|--------|-----------------|---|------------------------------------|
| -6.750 | $d_{yz}(\beta)$ | 0 | Fe1(1D:yz)(63.98) Cl2(1P:y)(12.67) |
|--------|-----------------|---|------------------------------------|

**Table S4** Calculated effective  $\alpha$ -set orbital interactions between  $P^{1-}$  and  $FeCl^{2+}$  fragments for  $[Fe(TPP\bullet)Cl]^+$ ,  $[Fe(OMTPP\bullet)Cl]^+$  and  $[Fe(OETPP\bullet)Cl]^+$

|                                            | $[Fe(TPP\bullet)Cl]^+$ | $[Fe(OMTPP\bullet)Cl]^+$ | $[Fe(OETPP\bullet)Cl]^+$ |
|--------------------------------------------|------------------------|--------------------------|--------------------------|
|                                            | (S = 2)                | (S = 2)                  | (S = 2)                  |
| $\langle d_{x^2-y^2}   P_{\sigma} \rangle$ | -0.0754                | -0.0497                  | -0.0454                  |
| $\langle d_{x^2-y^2}   a_{2u} \rangle$     | -0.0271                | -0.0456                  | -0.0494                  |
| $\langle d_{z^2}   P_{\sigma} \rangle$     | -0.0051                | -0.0093                  | -0.0125                  |
| $\langle d_{z^2}   a_{2u} \rangle$         | -0.0094                | -0.0071                  | -0.0066                  |
| $\langle d_{xz}   P_{\pi} \rangle$         | -0.0107                | -0.0032                  | -0.0050                  |
| $\langle d_{yz}   P_{\pi} \rangle$         | -0.0088                | -0.0015                  | -0.0018                  |
| $\langle d_{xy}   a_{1u} \rangle$          | -0.0003                | -0.0002                  | -0.0022                  |



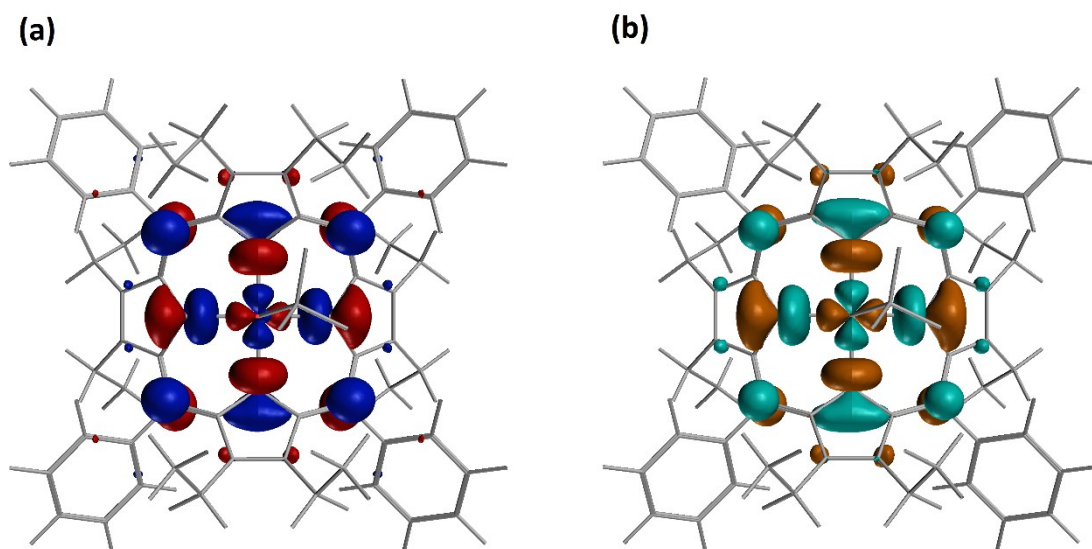

**Fig. S4.** (a) The occupied  $\alpha$ -set  $d_{x^2-y^2}$ - $a_{2u}$  MO, and (b) the unoccupied  $\beta$ -set  $d_{x^2-y^2}$ - $a_{2u}$  MO in the ferromagnetic spin state ( $S = 1$ ) calculation.

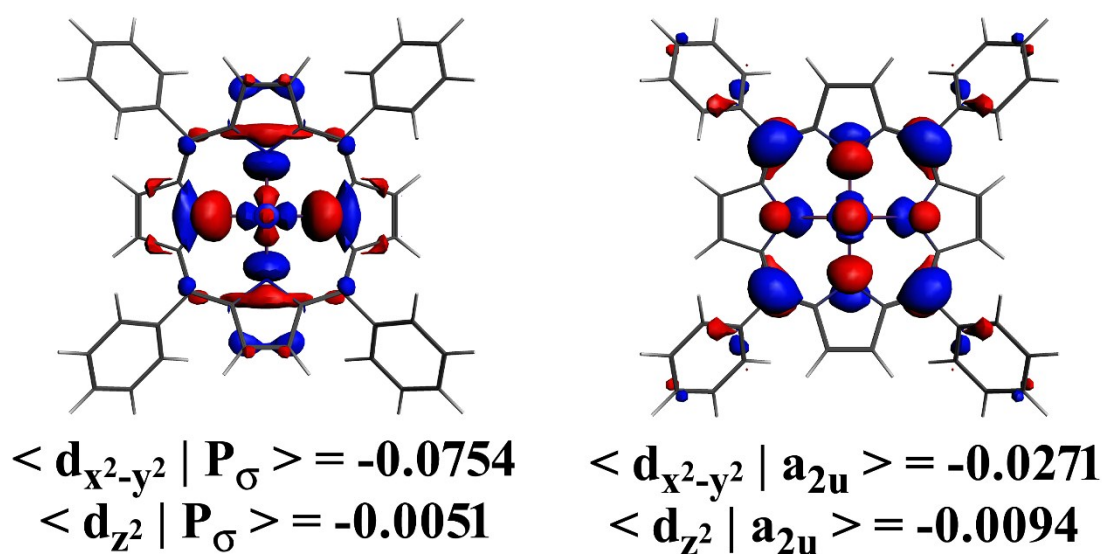

**Fig. S5.** Selected  $\alpha$ -set molecular orbitals based on spin-unrestricted calculations show the distinct orbital interactions between the iron  $d_{x^2-y^2}/d_{z^2}$  and porphyrin  $a_{2u}/\sigma$  orbital for  $[\text{Fe}(\text{TPP}\cdot)\text{Cl}]^+$ .

## Equations for paramagnetic $^1\text{H}$ NMR shifts<sup>1-5</sup>

$$\delta_{obs} = \delta_{dia} + \delta_{iso} \quad (\text{S4})$$

$$\delta_{iso} = \delta_{con} + \delta_{dip} = \delta_{con} + \delta_{dip}^{M.C.} \quad (\text{S5})$$

$$\delta_{con} = \frac{\mu_0 \mu_\beta^2 g_e^2 (S+1)}{9k_B T} \rho_{\alpha\beta} \quad (\text{S6})$$

$$\delta_{dip}^{M.C.} = -\frac{\mu_0}{4\pi} \left(\frac{1}{3N}\right) (\chi_{\parallel} - \chi_{\perp}) \left[\frac{(3\cos^2\theta - 1)}{r^3}\right] = -\frac{\mu_0}{4\pi} \left(\frac{1}{3N}\right) (\chi_{\parallel} - \chi_{\perp}) \times G \quad (\text{S7})$$

In order to estimate the dipolar contribution of paramagnetic shift, the magnetic susceptibility should be estimated by the Van Vleck equation:

$$\chi_{\parallel} = \frac{N \sum_n \left( \frac{E_n^{(1)2}}{kT} - 2E_n^{(2)} \right) \exp\left(-\frac{E_n^{(0)}}{kT}\right)}{\sum_n \exp\left(-\frac{E_n^{(0)}}{kT}\right)}$$

Where the total spin Hamiltonian operator is:

$$\hat{H} = g_u \mu_\beta S_u H_u + D[\mathcal{S}_z^2 - S(S+1)/3] + E(\mathcal{S}_x^2 - \mathcal{S}_y^2), \quad u = x, y, z$$

For  $S = 2$  systems with axial symmetry and external magnetic field (B) parallel to molecular z axis:

| $\hat{H}_z$   | $ 2\rangle$            | $ -2\rangle$           | $ 1\rangle$          | $ -1\rangle$         | $ 0\rangle$ |
|---------------|------------------------|------------------------|----------------------|----------------------|-------------|
| $\langle 2 $  | $4D+2g_z\mu_\beta H_z$ | 0                      | 0                    | 0                    | 0           |
| $\langle -2 $ | 0                      | $4D-2g_z\mu_\beta H_z$ | 0                    | 0                    | 0           |
| $\langle 1 $  | 0                      | 0                      | $D+g_z\mu_\beta H_z$ | 0                    | 0           |
| $\langle -1 $ | 0                      | 0                      | 0                    | $D-g_z\mu_\beta H_z$ | 0           |
| $\langle 0 $  | 0                      | 0                      | 0                    | 0                    | 0           |

$$\begin{aligned}
\chi_z &= \frac{N \sum_n E_n^{(1)2} \exp\left(-\frac{E_n^{(0)}}{kT}\right)}{kT \sum_n \exp\left(-\frac{E_n^{(0)}}{kT}\right)} = \frac{N\left[2 \times g_z^2 \mu_\beta^2 \times \exp\left(-\frac{D}{kT}\right) + 2 \times 4g_z^2 \mu_\beta^2\right]}{kT\left[\exp(0) + 2 \times \exp\left(-\frac{D}{kT}\right) + 2 \times \exp\left(-\frac{4D}{kT}\right)\right]} \\
&= \frac{2Ng_z^2 \mu_\beta^2 \left[\exp\left(-\frac{D}{kT}\right) + 4 \times \exp\left(-\frac{4D}{kT}\right)\right]}{kT\left[1 + 2\exp\left(-\frac{D}{kT}\right) + 2\exp\left(-\frac{4D}{kT}\right)\right]} = \frac{2Ng_z^2 \mu_\beta^2 (e^{-x} + 4e^{-4x})}{kT(1 + 2e^{-x} + 2e^{-4x})}, \text{ where } x = \frac{D}{kT} \quad (\text{S8})
\end{aligned}$$

Equation S8 is then expanded by Taylor series:

$$\chi_z = \frac{2Ng_z^2 \mu_\beta^2}{kT} - \frac{14Ng_z^2 \mu_\beta^2 D}{5(kT)^2} \quad (\text{S9})$$

When external magnetic field (B) perpendicular to molecular z axis:

| $\hat{H}_x$   | $ 2\rangle$         | $ -2\rangle$        | $ 1\rangle$                            | $ -1\rangle$                           | $ 0\rangle$                            |
|---------------|---------------------|---------------------|----------------------------------------|----------------------------------------|----------------------------------------|
| $\langle 2 $  | $4D$                | $0$                 | $g_x \mu_\beta H_x$                    | $0$                                    | $0$                                    |
| $\langle -2 $ | $0$                 | $4D$                | $0$                                    | $g_x \mu_\beta H_x$                    | $0$                                    |
| $\langle 1 $  | $g_x \mu_\beta H_x$ | $0$                 | $D$                                    | $0$                                    | $\sqrt{\frac{3}{2}} g_x \mu_\beta H_x$ |
| $\langle -1 $ | $0$                 | $g_x \mu_\beta H_x$ | $0$                                    | $D$                                    | $\sqrt{\frac{3}{2}} g_x \mu_\beta H_x$ |
| $\langle 0 $  | $0$                 | $0$                 | $\sqrt{\frac{3}{2}} g_x \mu_\beta H_x$ | $\sqrt{\frac{3}{2}} g_x \mu_\beta H_x$ | $0$                                    |

The eigenvalues can be obtained by using of Mathematica program:

$$\begin{aligned}
E_1 &= 4D + \frac{g_x^2 \mu_\beta^2 H_x^2}{3D} & E_2 &= 4D + \frac{g_x^2 \mu_\beta^2 H_x^2}{3D} \\
E_3 &= D + \frac{8g_x^2 \mu_\beta^2 H_x^2}{3D} & E_4 &= D - \frac{g_x^2 \mu_\beta^2 H_x^2}{3D} & E_5 &= -\frac{3g_x^2 \mu_\beta^2 H_x^2}{D}
\end{aligned}$$

The energy values for each energy level are listed as follow:

| n | $E^{(0)}$ | $E^{(1)}$ | $E^{(2)}$                      |
|---|-----------|-----------|--------------------------------|
| 1 | $4D$      | $0$       | $\frac{g_x^2 \mu_\beta^2}{3D}$ |

|   |    |   |                                 |
|---|----|---|---------------------------------|
| 2 | 4D | 0 | $\frac{g_x^2 \mu_\beta^2}{3D}$  |
| 3 | D  | 0 | $\frac{8g_x^2 \mu_\beta^2}{3D}$ |
| 4 | D  | 0 | $-\frac{g_x^2 \mu_\beta^2}{3D}$ |
| 5 | 0  | 0 | $-\frac{3g_x^2 \mu_\beta^2}{D}$ |

$$\chi_x = \frac{N \sum_n \left( \frac{E_n^{(1)2}}{kT} - 2E_n^{(2)} \right) \exp\left(-\frac{E_n^{(0)}}{kT}\right)}{\sum_n \exp\left(-\frac{E_n^{(0)}}{kT}\right)} = \frac{N \left( -\frac{4g_\perp^2 \mu_\beta^2}{3D} \exp\left(-\frac{4D}{kT}\right) - \frac{14g_\perp^2 \mu_\beta^2}{3D} \exp\left(-\frac{D}{kT}\right) + \frac{6g_\perp^2 \mu_\beta^2}{D} \right)}{1 + 2\exp\left(-\frac{D}{kT}\right) + 2\exp\left(-\frac{4D}{kT}\right)}$$

$$\begin{aligned} &= \frac{2Ng_\perp^2 \mu_\beta^2 \left( 9 - 7\exp\left(-\frac{D}{kT}\right) - 2\exp\left(-\frac{4D}{kT}\right) \right)}{3D \left( 1 + 2\exp\left(-\frac{D}{kT}\right) + 2\exp\left(-\frac{4D}{kT}\right) \right)} \\ &= \frac{2Ng_\perp^2 \mu_\beta^2 (9 - 7e^{-x} - 2e^{-4x})}{3kTx(1 + 2e^{-x} + 2e^{-4x})}, \text{ where } x = \frac{D}{kT} \end{aligned} \quad (\text{S10})$$

Equation S10 was then expanded by Taylor series:

$$\chi_x = \frac{2Ng_x^2 \mu_\beta^2}{kT} - \frac{7Ng_x^2 \mu_\beta^2 D}{5(kT)^2} \quad (\text{S11})$$

$$\begin{aligned} \chi_{\parallel} - \chi_{\perp} &= \frac{2Ng_z^2 \mu_\beta^2}{kT} - \frac{14Ng_z^2 \mu_\beta^2 D}{5(kT)^2} - \frac{2Ng_x^2 \mu_\beta^2}{kT} - \frac{7Ng_x^2 \mu_\beta^2 D}{5(kT)^2} \\ &= \frac{2N\mu_\beta^2 (g_{\parallel}^2 - g_{\perp}^2)}{kT} - \frac{14N\mu_\beta^2 (g_{\parallel}^2 + \frac{1}{2}g_{\perp}^2) D}{5(kT)^2} = \frac{21N\mu_\beta^2 g_e^2 D}{5(kT)^2} \end{aligned} \quad (\text{S12})$$

Based on equation S12, dipolar contribution can be calculated as follow:

$$\delta_{dip}^{M.C.} = -\frac{\mu_0 (\chi_{\parallel} - \chi_{\perp})}{4\pi \cdot 3N} \times G = -\frac{\mu_0 9\mu_\beta^2 g_e^2 G D}{4\pi 5(k_B T)^2} = -0.0567 \left( \frac{\text{ppm}}{\text{cm}^{-1}} \text{cm}^3 \right) \times G \times D \quad (\text{S13})$$

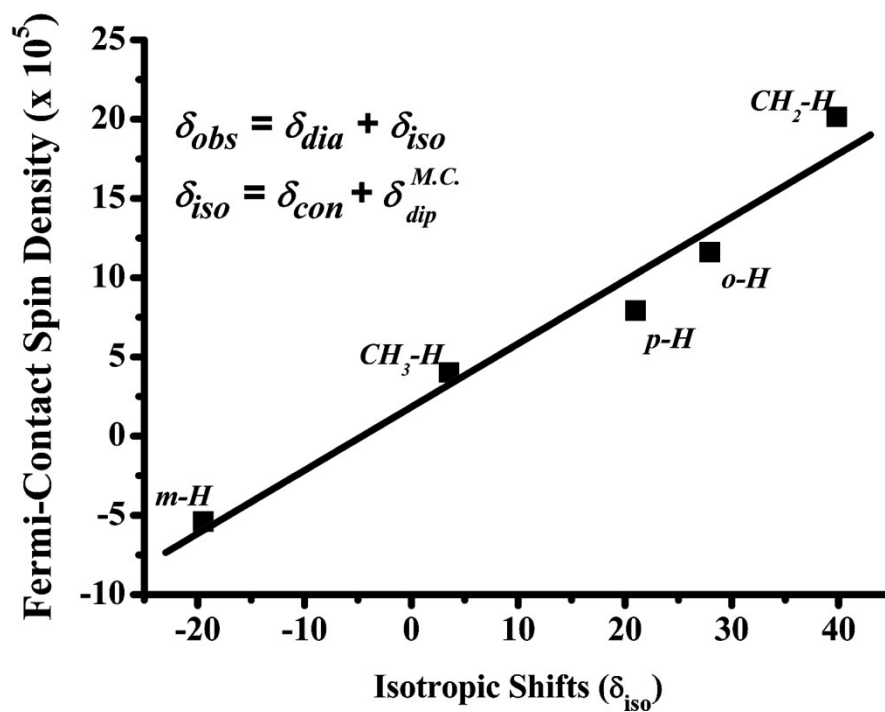

**Fig. 6.** Correlation between the calculated Fermi contact spin densities at each symmetry-distinct hydrogen atom and the experimental isotropic shifts of  $[Fe(OETPP\bullet)Cl][SbCl_6]$  with a slope of  $4.00 \times 10^{-6}$  au ppm<sup>-1</sup>,  $R^2 = 0.948$ .

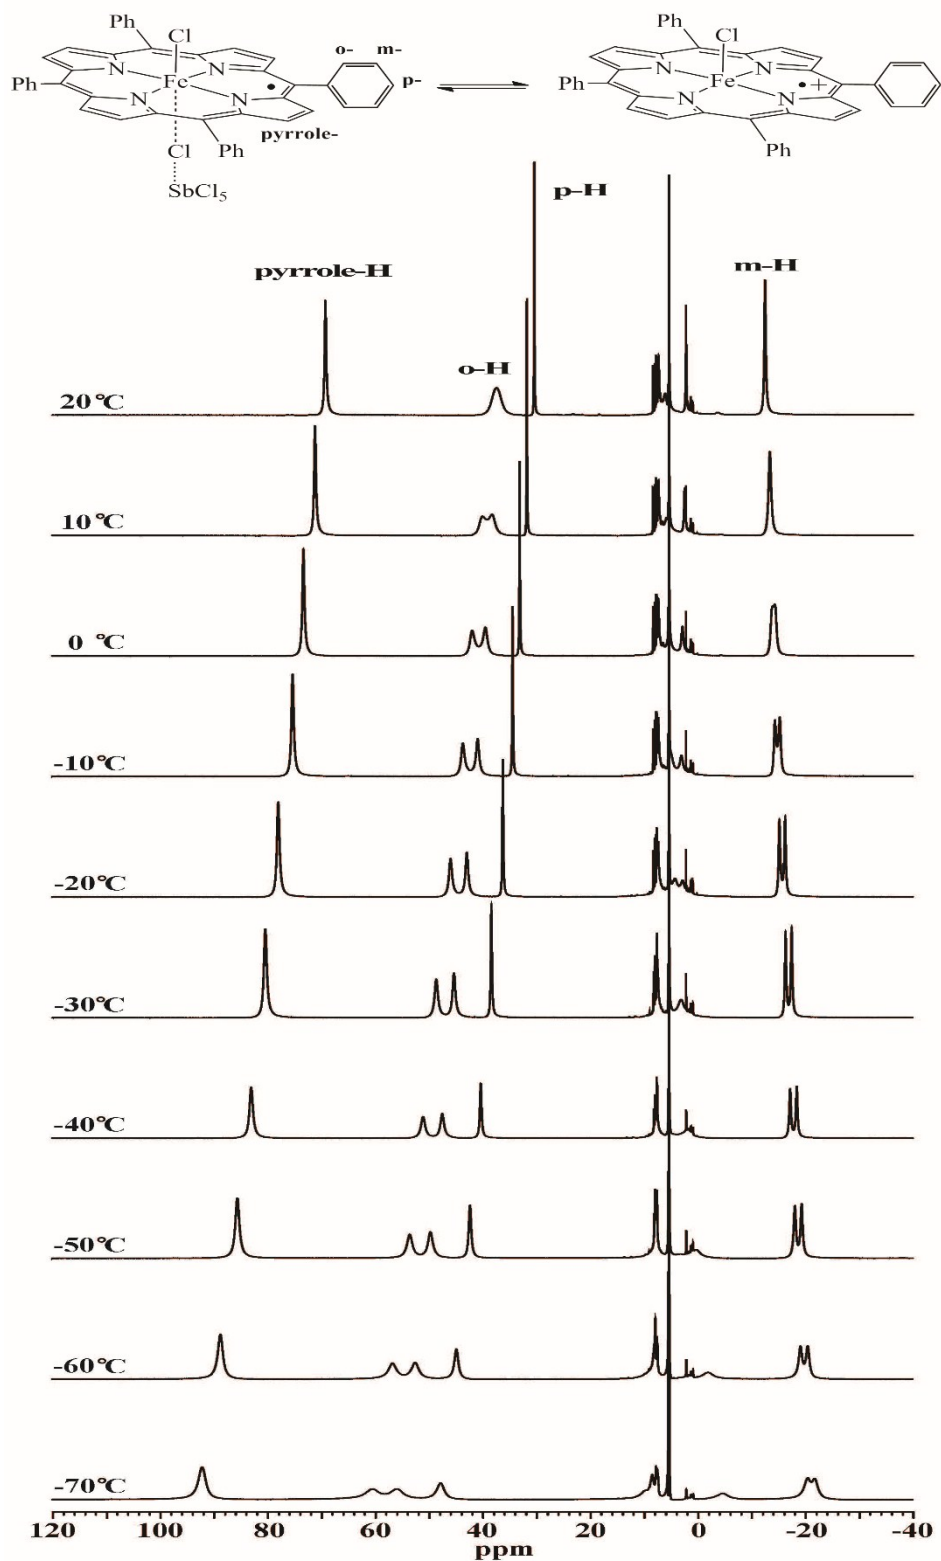

Fig. S7. Observed Variable-Temperature <sup>1</sup>H NMR (600 MHz) spectra of [Fe(TPP•)Cl][SbCl<sub>6</sub>] in CD<sub>2</sub>Cl<sub>2</sub>.

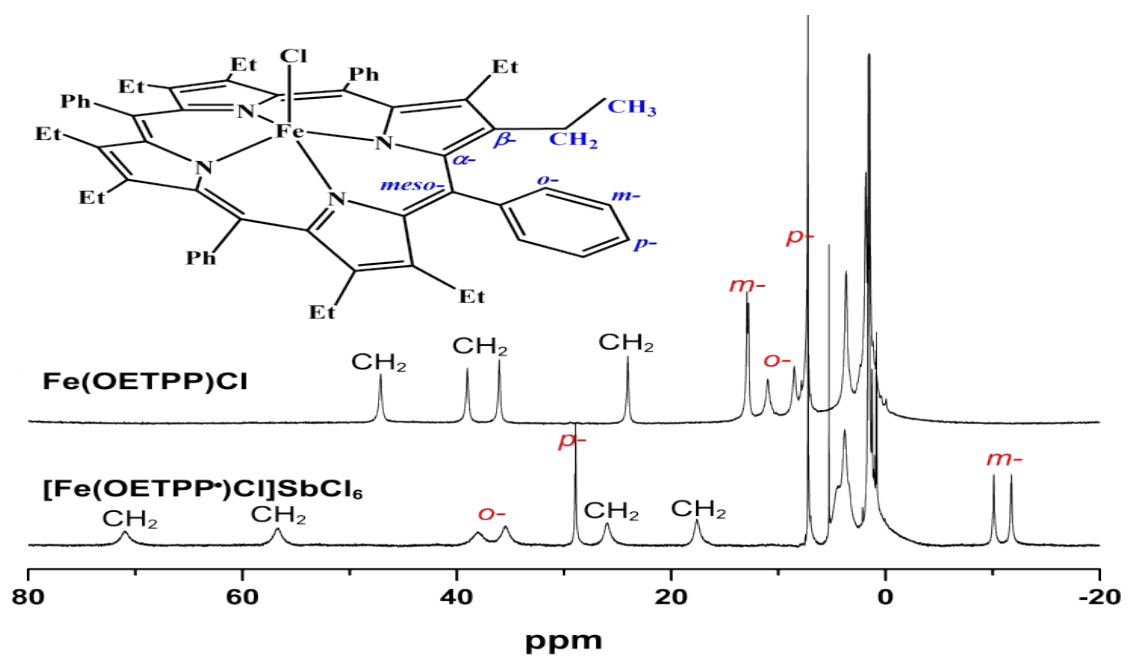

**Fig. S8.** NMR spectra of Fe(OETPP)Cl and [Fe(OETPP•)Cl][SbCl<sub>6</sub>] in CDCl<sub>3</sub>.

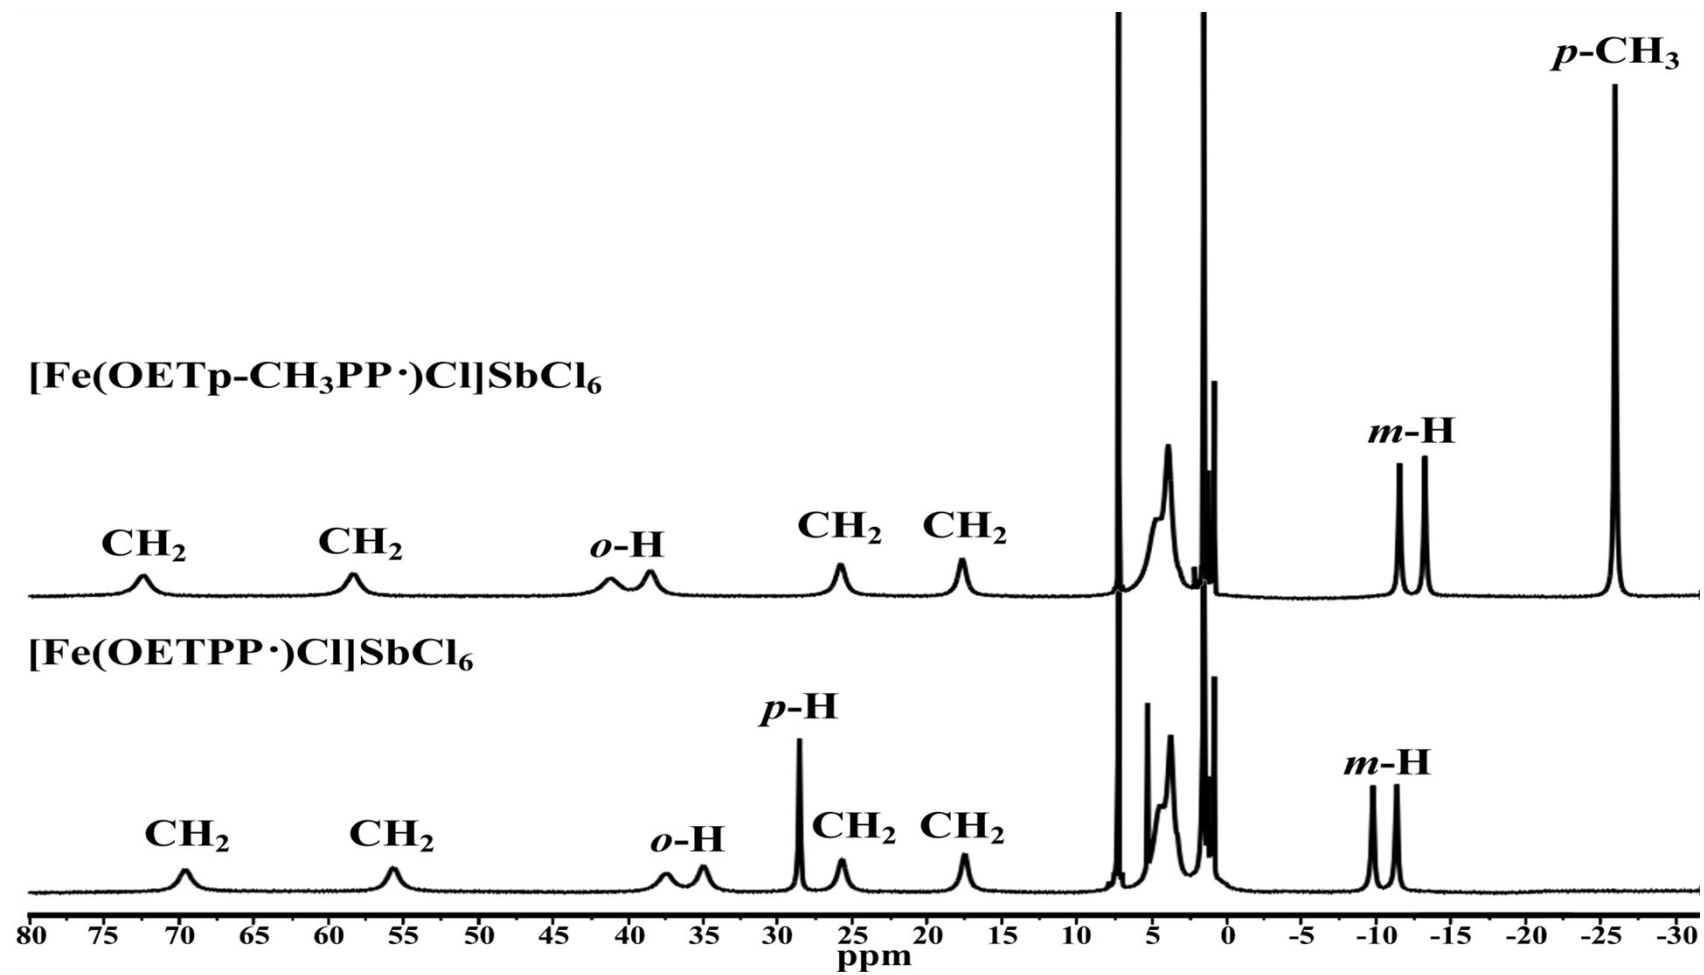

Fig. S9. <sup>1</sup>H NMR of [Fe(OETPP)Cl][SbCl<sub>6</sub>] and [Fe(OETp-CH<sub>3</sub>PP)Cl][SbCl<sub>6</sub>] in CDCl<sub>3</sub>



**Table S5.** Theoretically calculated paramagnetic shift of [Fe(OETPP•)Cl][SbCl<sub>6</sub>].<sup>a</sup>

|                    | Fermi contact<br>spin density, $\rho$ | $\delta_{con}$ (ppm) | Geometric<br>factor, G ( $\times$<br>$10^{21}$ cm <sup>-3</sup> ) | $\delta_{dip}^{M.C.}$ (ppm) | $\delta_{iso}$ (ppm) | averaged $\delta_{iso}$ (ppm) | $\delta_{calc.}$ (DFT) <sup>b</sup> | $\delta_{obs}$ (exp. data) <sup>b</sup> |
|--------------------|---------------------------------------|----------------------|-------------------------------------------------------------------|-----------------------------|----------------------|-------------------------------|-------------------------------------|-----------------------------------------|
| o-H                | 0.000096626                           | 22.89                | -6.365211194                                                      | 1.62                        | 24.52                | 28.87                         | 37.18                               | 36.3                                    |
| o-H                | 0.000135605                           | 32.13                | -4.308080504                                                      | 1.10                        | 33.22                | -                             |                                     |                                         |
| m-H                | -0.000062796                          | -14.88               | -1.854117305                                                      | 0.47                        | -14.40               | -12.27                        | -4.60                               | -10.8                                   |
| m-H                | -0.000045130                          | -10.69               | -2.203983332                                                      | 0.56                        | -10.13               | -                             |                                     |                                         |
| p-H                | 0.000079223                           | 18.77                | -1.565047604                                                      | 0.40                        | 19.17                | 19.17                         | 26.96                               | 28.8                                    |
| CH <sub>2</sub> -H | 0.000173232                           | 41.04                | -4.896048401                                                      | 1.25                        | 42.29                | 48.55                         | 50.86                               | 42.2                                    |
| CH <sub>2</sub> -H | 0.000180293                           | 42.71                | -4.896048401                                                      | 1.25                        | 43.96                | -                             |                                     |                                         |
| CH <sub>2</sub> -H | 0.000478239                           | 113.30               | -2.377718371                                                      | 0.61                        | 113.90               | -                             |                                     |                                         |
| CH <sub>2</sub> -H | -0.000025895                          | -6.13                | -0.650611801                                                      | 0.17                        | -5.97                | -                             |                                     |                                         |
| CH <sub>3</sub> -H | 0.000122465                           | 29.01                | 0.933128859                                                       | -0.24                       | 28.77                | 9.29                          | 9.75                                | 4.0                                     |
| CH <sub>3</sub> -H | -0.000001597                          | -0.38                | 0.933128859                                                       | -0.24                       | -0.62                |                               |                                     |                                         |
| CH <sub>3</sub> -H | -0.000017765                          | -4.21                | 0.933128859                                                       | -0.24                       | -4.45                |                               |                                     |                                         |
| CH <sub>3</sub> -H | -0.000047236                          | -11.19               | 0.773139824                                                       | -0.20                       | -11.39               |                               |                                     |                                         |
| CH <sub>3</sub> -H | 0.000235195                           | 55.72                | 0.773139824                                                       | -0.20                       | 55.52                |                               |                                     |                                         |
| CH <sub>3</sub> -H | -0.000050289                          | -11.91               | 0.773139824                                                       | -0.20                       | -12.11               |                               |                                     |                                         |

<sup>a</sup> Chemical shifts are in unit of ppm. <sup>b</sup>  $\delta_{calc.}(DFT) = \delta_{iso} + \delta_{dia}^{1H}$  NMR resonances of Zn(OETPP) are employed as diamagnetic reference ( $\delta_{dia}$ ), in which the chemical shifts are 8.31 ppm for o-H, 7.67 ppm for m-H, 7.79 ppm for p-H, 2.31 ppm for CH<sub>2</sub>-H, and 0.46 ppm for CH<sub>3</sub>-H.

**Table S6.** Crystal data and structure refinement for [Fe(OET(*p*-CH<sub>3</sub>)PP•)Cl][SbCl<sub>6</sub>].

|                                   |                                             |                 |
|-----------------------------------|---------------------------------------------|-----------------|
| Identification code               | fesbcl6                                     |                 |
| Empirical formula                 | C70 H82 Cl7 Fe N4 Sb                        |                 |
| Formula weight                    | 1405.15                                     |                 |
| Temperature                       | 150(2) K                                    |                 |
| Wavelength                        | 0.71073 Å                                   |                 |
| Crystal system                    | Monoclinic                                  |                 |
| Space group                       | P 21/n                                      |                 |
| Unit cell dimensions              | a = 17.8349(9) Å                            | α = 90°.        |
|                                   | b = 22.2509(12) Å                           | β = 94.594(5)°. |
|                                   | c = 18.1681(11) Å                           | γ = 90°.        |
| Volume                            | 7186.7(7) Å <sup>3</sup>                    |                 |
| Z                                 | 4                                           |                 |
| Density (calculated)              | 1.299 Mg/m <sup>3</sup>                     |                 |
| Absorption coefficient            | 0.879 mm <sup>-1</sup>                      |                 |
| F(000)                            | 2904                                        |                 |
| Crystal size                      | 0.37 x 0.18 x 0.12 mm <sup>3</sup>          |                 |
| Theta range for data collection   | 2.76 to 29.19°.                             |                 |
| Index ranges                      | -21 ≤ h ≤ 24, -30 ≤ k ≤ 30, -20 ≤ l ≤ 24    |                 |
| Reflections collected             | 37056                                       |                 |
| Independent reflections           | 16651 [R(int) = 0.1025]                     |                 |
| Completeness to theta = 26.00°    | 99.8 %                                      |                 |
| Absorption correction             | Semi-empirical from equivalents             |                 |
| Max. and min. transmission        | 1.00000 and 0.92974                         |                 |
| Refinement method                 | Full-matrix least-squares on F <sup>2</sup> |                 |
| Data / restraints / parameters    | 16651 / 0 / 748                             |                 |
| Goodness-of-fit on F <sup>2</sup> | 0.996                                       |                 |
| Final R indices [I > 2σ(I)]       | R1 = 0.1086, wR2 = 0.2472                   |                 |
| R indices (all data)              | R1 = 0.2139, wR2 = 0.3000                   |                 |
| Largest diff. peak and hole       | 1.731 and -1.301 e.Å <sup>-3</sup>          |                 |

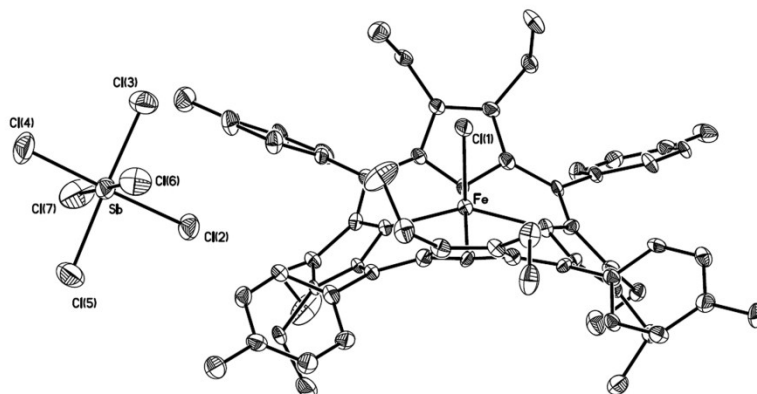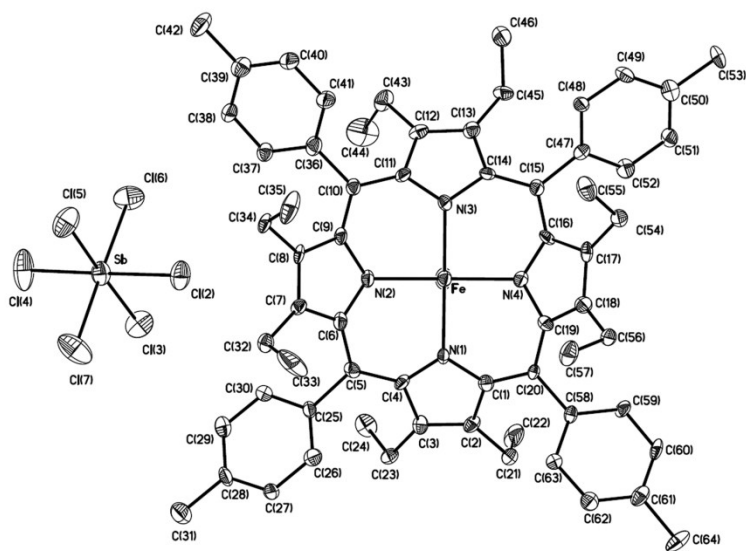

**Fig. S10.** ORTEP diagram of  $[\text{Fe}(\text{OET}(\text{p-CH}_3)\text{PP}\cdot)\text{Cl}][\text{SbCl}_6]$  with 30% probability ellipsoids. Hydrogen atoms are omitted for clarity.

## Cartesian coordinates of [Fe(TPP•)Cl]<sup>+</sup> for calculation<sup>9</sup>

|    |           |           |           |
|----|-----------|-----------|-----------|
| Fe | 0.000000  | 0.000000  | 0.000000  |
| Cl | 0.000000  | 0.000000  | 2.168000  |
| N  | -2.019000 | 0.000000  | -0.461000 |
| N  | 0.000000  | 2.024000  | -0.407000 |
| N  | 2.019000  | 0.000000  | -0.461000 |
| N  | 0.000000  | -2.024000 | -0.407000 |
| C  | -2.824000 | -1.104000 | -0.594000 |
| C  | -2.824000 | 1.104000  | -0.594000 |
| C  | -1.103000 | 2.821000  | -0.170000 |
| C  | 1.103000  | 2.821000  | -0.170000 |
| C  | 2.824000  | 1.104000  | -0.594000 |
| C  | 2.824000  | -1.104000 | -0.594000 |
| C  | 1.103000  | -2.821000 | -0.170000 |
| C  | -1.103000 | -2.821000 | -0.170000 |
| C  | -4.164000 | -0.683000 | -0.919000 |
| C  | -4.164000 | 0.683000  | -0.919000 |
| C  | -0.692000 | 4.119000  | 0.254000  |
| C  | 0.692000  | 4.119000  | 0.254000  |
| C  | 4.164000  | 0.683000  | -0.919000 |
| C  | 4.164000  | -0.683000 | -0.919000 |
| C  | 0.692000  | -4.119000 | 0.254000  |
| C  | -0.692000 | -4.119000 | 0.254000  |
| C  | -2.419000 | 2.419000  | -0.358000 |
| C  | 2.419000  | 2.419000  | -0.358000 |
| C  | 2.419000  | -2.419000 | -0.358000 |
| C  | -2.419000 | -2.419000 | -0.358000 |
| C  | -3.469000 | 3.469000  | -0.241000 |
| C  | 3.469000  | 3.469000  | -0.241000 |
| C  | 3.469000  | -3.469000 | -0.241000 |
| C  | -3.469000 | -3.469000 | -0.241000 |
| C  | -4.537000 | 3.273000  | 0.660000  |
| C  | 4.537000  | 3.273000  | 0.660000  |
| C  | 4.537000  | -3.273000 | 0.660000  |
| C  | -4.537000 | -3.273000 | 0.660000  |
| C  | -3.418000 | 4.620000  | -1.006000 |
| C  | 3.418000  | 4.620000  | -1.006000 |
| C  | 3.418000  | -4.620000 | -1.006000 |
| C  | -3.418000 | -4.620000 | -1.006000 |
| C  | -5.509000 | 4.256000  | 0.808000  |
| C  | 5.509000  | 4.256000  | 0.808000  |
| C  | 5.509000  | -4.256000 | 0.808000  |
| C  | -5.509000 | -4.256000 | 0.808000  |
| C  | -4.400000 | 5.600000  | -0.868000 |
| C  | 4.400000  | 5.600000  | -0.868000 |
| C  | 4.400000  | -5.600000 | -0.868000 |
| C  | -4.400000 | -5.600000 | -0.868000 |
| C  | -5.437000 | 5.437000  | 0.031000  |
| C  | 5.437000  | 5.437000  | 0.031000  |
| C  | 5.437000  | -5.437000 | 0.031000  |
| C  | -5.437000 | -5.437000 | 0.031000  |
| H  | -5.008000 | -1.326000 | -1.124000 |
| H  | -5.008000 | 1.326000  | -1.124000 |
| H  | -1.336000 | 4.943000  | 0.523000  |
| H  | 1.336000  | 4.943000  | 0.523000  |
| H  | 5.008000  | 1.326000  | -1.124000 |
| H  | 5.008000  | -1.326000 | -1.124000 |

|   |           |           |           |
|---|-----------|-----------|-----------|
| H | 1.336000  | -4.943000 | 0.523000  |
| H | -1.336000 | -4.943000 | 0.523000  |
| H | -4.600000 | 2.360000  | 1.234000  |
| H | 4.600000  | 2.360000  | 1.234000  |
| H | 4.600000  | -2.360000 | 1.234000  |
| H | -4.600000 | -2.360000 | 1.234000  |
| H | -2.614000 | 4.760000  | -1.713000 |
| H | 2.614000  | 4.760000  | -1.713000 |
| H | 2.614000  | -4.760000 | -1.713000 |
| H | -2.614000 | -4.760000 | -1.713000 |
| H | -6.316000 | 4.119000  | 1.513000  |
| H | 6.316000  | 4.119000  | 1.513000  |
| H | 6.316000  | -4.119000 | 1.513000  |
| H | -6.316000 | -4.119000 | 1.513000  |
| H | -4.350000 | 6.495000  | -1.470000 |
| H | 4.350000  | 6.495000  | -1.470000 |
| H | 4.350000  | -6.495000 | -1.470000 |
| H | -4.350000 | -6.495000 | -1.470000 |
| H | 6.179000  | -6.179000 | 0.285000  |
| H | -6.179000 | -6.179000 | 0.285000  |
| H | -6.179000 | 6.179000  | 0.285000  |
| H | 6.179000  | 6.179000  | 0.285000  |

### **Cartesian coordinates of Fe(OETPP)Cl for calculation**<sup>10</sup>

|    |           |           |           |
|----|-----------|-----------|-----------|
| Fe | 0.000000  | 0.000000  | 0.000000  |
| Cl | 0.000000  | 0.000000  | 2.242000  |
| N  | -1.968000 | 0.000000  | -0.571000 |
| N  | 0.000000  | 1.980000  | -0.362000 |
| N  | 1.968000  | 0.000000  | -0.571000 |
| N  | 0.000000  | -1.980000 | -0.362000 |
| C  | -2.731000 | -1.108000 | -0.878000 |
| C  | -2.731000 | 1.108000  | -0.878000 |
| C  | -1.097000 | 2.738000  | 0.000000  |
| C  | 1.097000  | 2.738000  | 0.000000  |
| C  | 2.731000  | 1.108000  | -0.878000 |
| C  | 2.731000  | -1.108000 | -0.878000 |
| C  | 1.097000  | -2.738000 | 0.000000  |
| C  | -1.097000 | -2.738000 | 0.000000  |
| C  | -3.942000 | -0.673000 | -1.565000 |
| C  | -3.942000 | 0.673000  | -1.565000 |
| C  | -0.678000 | 3.894000  | 0.741000  |
| C  | 0.678000  | 3.894000  | 0.741000  |
| C  | 3.942000  | 0.673000  | -1.565000 |
| C  | 3.942000  | -0.673000 | -1.565000 |
| C  | 0.678000  | -3.894000 | 0.741000  |
| C  | -0.678000 | -3.894000 | 0.741000  |
| C  | -2.389000 | 2.389000  | -0.434000 |
| C  | 2.389000  | 2.389000  | -0.434000 |
| C  | 2.389000  | -2.389000 | -0.434000 |
| C  | -2.389000 | -2.389000 | -0.434000 |
| C  | -4.946000 | -1.541000 | -2.268000 |
| C  | -4.946000 | 1.541000  | -2.268000 |
| C  | -1.522000 | 4.794000  | 1.580000  |
| C  | 1.522000  | 4.794000  | 1.580000  |
| C  | 4.946000  | 1.541000  | -2.268000 |
| C  | 4.946000  | -1.541000 | -2.268000 |

|   |           |           |           |
|---|-----------|-----------|-----------|
| C | 1.522000  | -4.794000 | 1.580000  |
| C | -1.522000 | -4.794000 | 1.580000  |
| C | -3.435000 | 3.435000  | -0.376000 |
| C | 3.435000  | 3.435000  | -0.376000 |
| C | 3.435000  | -3.435000 | -0.376000 |
| C | -3.435000 | -3.435000 | -0.376000 |
| C | -4.514000 | 3.292000  | 0.482000  |
| C | 4.514000  | 3.292000  | 0.482000  |
| C | 4.514000  | -3.292000 | 0.482000  |
| C | -4.514000 | -3.292000 | 0.482000  |
| C | -3.365000 | 4.541000  | -1.165000 |
| C | 3.365000  | 4.541000  | -1.165000 |
| C | 3.365000  | -4.541000 | -1.165000 |
| C | -3.365000 | -4.541000 | -1.165000 |
| C | -5.478000 | 4.278000  | 0.541000  |
| C | 5.478000  | 4.278000  | 0.541000  |
| C | 5.478000  | -4.278000 | 0.541000  |
| C | -5.478000 | -4.278000 | 0.541000  |
| C | -4.327000 | 5.506000  | -1.105000 |
| C | 4.327000  | 5.506000  | -1.105000 |
| C | 4.327000  | -5.506000 | -1.105000 |
| C | -4.327000 | -5.506000 | -1.105000 |
| C | -5.360000 | 5.359000  | -0.253000 |
| C | 5.360000  | 5.359000  | -0.253000 |
| C | 5.360000  | -5.359000 | -0.253000 |
| C | -5.360000 | -5.359000 | -0.253000 |
| H | 6.115000  | 6.130000  | -0.205000 |
| H | 4.261000  | 6.381000  | -1.735000 |
| H | 2.536000  | 4.656000  | -1.848000 |
| H | 4.600000  | 2.412000  | 1.102000  |
| H | 6.316000  | 4.184000  | 1.215000  |
| H | 4.600000  | -2.412000 | 1.102000  |
| H | 6.316000  | -4.184000 | 1.215000  |
| H | 6.115000  | -6.130000 | -0.205000 |
| H | 4.261000  | -6.381000 | -1.735000 |
| H | 2.536000  | -4.656000 | -1.848000 |
| H | -2.536000 | -4.656000 | -1.848000 |
| H | -4.261000 | -6.381000 | -1.735000 |
| H | -6.115000 | -6.130000 | -0.205000 |
| H | -6.316000 | -4.184000 | 1.215000  |
| H | -4.600000 | -2.412000 | 1.102000  |
| H | -4.600000 | 2.412000  | 1.102000  |
| H | -6.316000 | 4.184000  | 1.215000  |
| H | -6.115000 | 6.130000  | -0.205000 |
| H | -4.261000 | 6.381000  | -1.735000 |
| H | -2.536000 | 4.656000  | -1.848000 |
| C | 4.408000  | -2.100000 | -3.588000 |
| C | 4.408000  | 2.100000  | -3.588000 |
| C | 1.931000  | -4.093000 | 2.878000  |
| C | -1.931000 | -4.093000 | 2.878000  |
| C | 1.931000  | 4.093000  | 2.878000  |
| C | -1.931000 | 4.093000  | 2.878000  |
| C | -4.408000 | -2.100000 | -3.588000 |
| C | -4.408000 | 2.100000  | -3.588000 |
| H | 2.550000  | -4.769000 | 3.479000  |
| H | 2.504000  | -3.189000 | 2.640000  |
| H | 0.953000  | -5.698000 | 1.823000  |
| H | 1.034000  | -3.818000 | 3.444000  |
| H | 2.423000  | -5.069000 | 1.020000  |
| H | -1.034000 | -3.818000 | 3.444000  |

|   |           |           |           |
|---|-----------|-----------|-----------|
| H | -2.550000 | -4.769000 | 3.479000  |
| H | -0.953000 | -5.698000 | 1.823000  |
| H | -2.504000 | -3.189000 | 2.640000  |
| H | -2.423000 | -5.069000 | 1.020000  |
| H | -1.034000 | 3.818000  | 3.444000  |
| H | -2.504000 | 3.189000  | 2.640000  |
| H | -2.550000 | 4.769000  | 3.479000  |
| H | -0.953000 | 5.698000  | 1.823000  |
| H | -2.423000 | 5.069000  | 1.020000  |
| H | -5.209000 | -2.378000 | -1.612000 |
| H | -3.515000 | -2.705000 | -3.392000 |
| H | -4.149000 | -1.272000 | -4.257000 |
| H | -5.176000 | -2.724000 | -4.060000 |
| H | -5.842000 | -0.945000 | -2.477000 |
| H | -5.209000 | 2.378000  | -1.612000 |
| H | -3.515000 | 2.705000  | -3.392000 |
| H | -4.149000 | 1.272000  | -4.257000 |
| H | -5.842000 | 0.945000  | -2.477000 |
| H | -5.176000 | 2.724000  | -4.060000 |
| H | 1.034000  | 3.818000  | 3.444000  |
| H | 2.504000  | 3.189000  | 2.640000  |
| H | 2.423000  | 5.069000  | 1.020000  |
| H | 0.953000  | 5.698000  | 1.823000  |
| H | 2.550000  | 4.769000  | 3.479000  |
| H | 4.149000  | -1.272000 | -4.257000 |
| H | 5.176000  | -2.724000 | -4.060000 |
| H | 3.515000  | -2.705000 | -3.392000 |
| H | 5.209000  | -2.378000 | -1.612000 |
| H | 5.842000  | -0.945000 | -2.477000 |
| H | 5.842000  | 0.945000  | -2.477000 |
| H | 5.209000  | 2.378000  | -1.612000 |
| H | 4.149000  | 1.272000  | -4.257000 |
| H | 3.515000  | 2.705000  | -3.392000 |
| H | 5.176000  | 2.724000  | -4.060000 |

### Cartesian coordinates of [Fe(OETPP•)Cl]<sup>+</sup> for calculation

|    |           |           |           |
|----|-----------|-----------|-----------|
| Fe | 0.000000  | 0.000000  | 0.000000  |
| Cl | 0.000000  | -0.000000 | -2.217000 |
| N  | -1.991000 | -0.000000 | 0.403000  |
| N  | 1.991000  | 0.000000  | 0.403000  |
| N  | -0.000100 | -1.972000 | 0.541000  |
| N  | -0.000100 | 1.972000  | 0.541000  |
| C  | -2.717000 | 1.097000  | 0.001000  |
| C  | -2.717000 | -1.097000 | 0.001000  |
| C  | 2.717000  | -1.097000 | 0.001000  |
| C  | 2.717000  | 1.097000  | 0.001000  |
| C  | -1.093000 | -2.669000 | 0.974000  |
| C  | 1.093000  | -2.669000 | 0.974000  |
| C  | 1.093000  | 2.669000  | 0.974000  |
| C  | -1.093000 | 2.669000  | 0.974000  |
| C  | -2.391000 | 2.376000  | 0.486000  |
| C  | -2.391000 | -2.376000 | 0.486000  |
| C  | 2.391000  | -2.376000 | 0.486000  |
| C  | 2.391000  | 2.376000  | 0.486000  |

|   |           |           |           |
|---|-----------|-----------|-----------|
| C | -3.833000 | 0.681000  | -0.821000 |
| C | -3.833000 | -0.681000 | -0.821000 |
| C | 3.833000  | -0.681000 | -0.821000 |
| C | 3.833000  | 0.681000  | -0.821000 |
| C | -0.682000 | -3.748000 | 1.842000  |
| C | 0.682000  | -3.748000 | 1.842000  |
| C | 0.682000  | 3.748000  | 1.842000  |
| C | -0.682000 | 3.748000  | 1.842000  |
| C | -4.722000 | 1.546000  | -1.666000 |
| C | -4.722000 | -1.546000 | -1.666000 |
| C | 4.722000  | -1.546000 | -1.666000 |
| C | 4.722000  | 1.546000  | -1.666000 |
| C | -1.558000 | -4.569000 | 2.750000  |
| C | 1.558000  | -4.569000 | 2.750000  |
| C | 1.558000  | 4.569000  | 2.750000  |
| C | -1.558000 | 4.569000  | 2.750000  |
| C | -4.028000 | 2.018000  | -2.916000 |
| C | -4.028000 | -2.018000 | -2.916000 |
| C | 4.028000  | -2.018000 | -2.916000 |
| C | 4.028000  | 2.018000  | -2.916000 |
| C | -1.918000 | -3.766000 | 3.972000  |
| C | 1.918000  | -3.766000 | 3.972000  |
| C | 1.918000  | 3.766000  | 3.972000  |
| C | -1.918000 | 3.766000  | 3.972000  |
| C | -3.382000 | -3.463000 | 0.440000  |
| C | 3.382000  | -3.463000 | 0.440000  |
| C | 3.382000  | 3.463000  | 0.440000  |
| C | -3.382000 | 3.463000  | 0.440000  |
| C | -3.057000 | -4.633000 | -0.210000 |
| C | 3.057000  | -4.633000 | -0.210000 |
| C | 3.057000  | 4.633000  | -0.210000 |
| C | -3.057000 | 4.633000  | -0.210000 |
| C | -3.973000 | -5.661000 | -0.275000 |
| C | 3.973000  | -5.661000 | -0.275000 |
| C | 3.973000  | 5.661000  | -0.275000 |
| C | -3.973000 | 5.661000  | -0.275000 |
| C | -5.216000 | -5.518000 | 0.311000  |
| C | 5.216000  | -5.518000 | 0.311000  |
| C | 5.216000  | 5.518000  | 0.311000  |
| C | -5.216000 | 5.518000  | 0.311000  |
| C | -5.542000 | -4.348000 | 0.961000  |
| C | 5.542000  | -4.348000 | 0.961000  |
| C | 5.542000  | 4.348000  | 0.961000  |
| C | -5.542000 | 4.348000  | 0.961000  |
| C | -4.625000 | -3.320000 | 1.025000  |
| C | 4.625000  | -3.320000 | 1.025000  |
| C | 4.625000  | 3.320000  | 1.025000  |
| C | -4.625000 | 3.320000  | 1.025000  |
| H | -5.597000 | 0.977100  | -1.945200 |
| H | -5.597000 | -0.977100 | -1.945200 |
| H | 5.597000  | -0.977100 | -1.945000 |
| H | 5.597000  | 0.977100  | -1.945000 |
| H | -5.022000 | 2.406500  | -1.086400 |
| H | -5.022000 | -2.406500 | -1.086400 |
| H | 5.022000  | -2.406500 | -1.086400 |
| H | 5.022000  | 2.406500  | -1.086400 |
| H | -1.028000 | -5.460800 | 3.049900  |
| H | 1.028000  | -5.460800 | 3.049900  |
| H | 1.028000  | 5.460800  | 3.049900  |
| H | -1.028000 | 5.460800  | 3.049900  |



|   |           |           |           |
|---|-----------|-----------|-----------|
| H | -2.459700 | -4.846100 | 2.224100  |
| H | 2.459700  | -4.846100 | 2.224100  |
| H | 2.459700  | 4.846100  | 2.224100  |
| H | -2.459700 | 4.846100  | 2.224100  |
| H | -4.041000 | 1.327000  | -3.746000 |
| H | -4.041000 | -1.327000 | -3.746000 |
| H | 4.041000  | -1.327000 | -3.746000 |
| H | 4.041000  | 1.327000  | -3.746000 |
| H | -2.972000 | 2.131000  | -2.721000 |
| H | -2.972000 | -2.131000 | -2.721000 |
| H | 2.972000  | -2.131000 | -2.721000 |
| H | 2.972000  | 2.131000  | -2.721000 |
| H | -4.310000 | 3.002000  | -3.262000 |
| H | -4.310000 | -3.002000 | -3.262000 |
| H | 4.310000  | -3.002000 | -3.262000 |
| H | 4.310000  | 3.002000  | -3.262000 |
| H | -2.294000 | 2.772000  | 3.782000  |
| H | 2.294000  | 2.772000  | 3.782000  |
| H | 2.294000  | -2.772000 | 3.782000  |
| H | -2.294000 | -2.772000 | 3.782000  |
| H | -2.560000 | 4.263000  | 4.684000  |
| H | 2.560000  | 4.263000  | 4.684000  |
| H | 2.560000  | -4.263000 | 4.684000  |
| H | -2.560000 | -4.263000 | 4.684000  |
| H | -1.027000 | 3.574000  | 4.552000  |
| H | 1.027000  | 3.574000  | 4.552000  |
| H | 1.027000  | -3.574000 | 4.552000  |
| H | -1.027000 | -3.574000 | 4.552000  |
| H | 2.085300  | 4.744200  | -0.668100 |
| H | -2.085300 | 4.744200  | -0.668100 |
| H | -2.085300 | -4.744200 | -0.668100 |
| H | 2.085300  | -4.744200 | -0.668100 |
| H | 3.717000  | 6.578000  | -0.784800 |
| H | -3.717000 | 6.578000  | -0.784800 |
| H | -3.717000 | -6.578000 | -0.784800 |
| H | 3.717000  | -6.578000 | -0.784800 |
| H | 5.935000  | 6.322700  | 0.261000  |
| H | -5.935000 | 6.322700  | 0.261000  |
| H | -5.935000 | -6.322700 | 0.261000  |
| H | 5.935000  | -6.322700 | 0.261000  |
| H | 6.513700  | 4.237000  | 1.419000  |
| H | -6.513700 | 4.237000  | 1.419000  |
| H | -6.513700 | -4.237000 | 1.419000  |
| H | 6.513700  | -4.237000 | 1.419000  |
| H | 4.880500  | 2.402200  | 1.534000  |
| H | -4.880500 | 2.402200  | 1.534000  |
| H | -4.880500 | -2.402200 | 1.534000  |
| H | 4.880500  | -2.402200 | 1.534000  |

### Cartesian coordinates of Cu(OETPP•)ClO<sub>4</sub> for calculation<sup>11</sup>

|    |           |          |           |
|----|-----------|----------|-----------|
| Cu | 0.000000  | 0.000000 | 0.000000  |
| O  | 0.000000  | 0.000000 | 2.443000  |
| N  | -1.968000 | 0.000000 | -0.137000 |
| N  | 0.000000  | 1.971000 | -0.050000 |
| N  | 1.968000  | 0.000000 | -0.137000 |

|   |           |           |           |
|---|-----------|-----------|-----------|
| N | 0.000000  | -1.971000 | -0.050000 |
| C | -2.683000 | -1.093000 | -0.571000 |
| C | -2.683000 | 1.093000  | -0.571000 |
| C | -1.094000 | 2.670000  | 0.418000  |
| C | 1.094000  | 2.670000  | 0.418000  |
| C | 2.683000  | 1.093000  | -0.571000 |
| C | 2.683000  | -1.093000 | -0.571000 |
| C | 1.094000  | -2.670000 | 0.418000  |
| C | -1.094000 | -2.670000 | 0.418000  |
| C | -3.793000 | -0.679000 | -1.396000 |
| C | -3.793000 | 0.679000  | -1.396000 |
| C | -0.680000 | 3.727000  | 1.303000  |
| C | 0.680000  | 3.727000  | 1.303000  |
| C | 3.793000  | 0.679000  | -1.396000 |
| C | 3.793000  | -0.679000 | -1.396000 |
| C | 0.680000  | -3.727000 | 1.303000  |
| C | -0.680000 | -3.727000 | 1.303000  |
| C | -2.375000 | 2.364000  | -0.062000 |
| C | 2.375000  | 2.364000  | -0.062000 |
| C | 2.375000  | -2.364000 | -0.062000 |
| C | -2.375000 | -2.364000 | -0.062000 |
| C | -1.474000 | 4.529000  | 2.223000  |
| C | 1.474000  | 4.529000  | 2.223000  |
| C | 4.652000  | 1.556000  | -2.254000 |
| C | 4.652000  | -1.556000 | -2.254000 |
| C | 1.474000  | -4.529000 | 2.223000  |
| C | -1.474000 | -4.529000 | 2.223000  |
| C | -4.652000 | -1.556000 | -2.254000 |
| C | -4.652000 | 1.556000  | -2.254000 |
| C | -3.422000 | 3.404000  | -0.016000 |
| C | 3.422000  | 3.404000  | -0.016000 |
| C | 3.422000  | -3.404000 | -0.016000 |
| C | -3.422000 | -3.404000 | -0.016000 |
| C | -3.216000 | 4.618000  | -0.618000 |
| C | 3.216000  | 4.618000  | -0.618000 |
| C | 3.216000  | -4.618000 | -0.618000 |
| C | -3.216000 | -4.618000 | -0.618000 |
| C | -4.602000 | 3.171000  | 0.632000  |
| C | 4.602000  | 3.171000  | 0.632000  |
| C | 4.602000  | -3.171000 | 0.632000  |
| C | -4.602000 | -3.171000 | 0.632000  |
| C | -4.193000 | 5.587000  | -0.551000 |
| C | 4.193000  | 5.587000  | -0.551000 |
| C | 4.193000  | -5.587000 | -0.551000 |
| C | -4.193000 | -5.587000 | -0.551000 |
| C | -5.555000 | -4.144000 | 0.700000  |
| C | -5.555000 | 4.144000  | 0.700000  |
| C | 5.555000  | 4.144000  | 0.700000  |
| C | 5.555000  | -4.144000 | 0.700000  |
| C | -5.341000 | 5.338000  | 0.103000  |
| C | 5.341000  | 5.338000  | 0.103000  |
| C | 5.341000  | -5.338000 | 0.103000  |
| C | -5.341000 | -5.338000 | 0.103000  |
| H | 5.007000  | 2.397000  | -1.648000 |
| H | 5.509000  | 0.970000  | -2.604000 |
| H | 5.509000  | -0.970000 | -2.604000 |
| H | 5.007000  | -2.397000 | -1.648000 |
| C | 3.911000  | -2.112000 | -3.473000 |
| H | 4.591000  | -2.743000 | -4.057000 |
| H | 3.557000  | -1.282000 | -4.095000 |

|   |           |           |           |
|---|-----------|-----------|-----------|
| H | 3.055000  | -2.709000 | -3.139000 |
| C | 3.911000  | 2.112000  | -3.473000 |
| H | 4.591000  | 2.743000  | -4.057000 |
| H | 3.055000  | 2.709000  | -3.139000 |
| H | 3.557000  | 1.282000  | -4.095000 |
| H | -5.509000 | 0.970000  | -2.604000 |
| H | -5.007000 | 2.397000  | -1.648000 |
| C | -3.911000 | 2.112000  | -3.473000 |
| H | -3.055000 | 2.709000  | -3.139000 |
| H | -4.591000 | 2.743000  | -4.057000 |
| H | -3.557000 | 1.282000  | -4.095000 |
| H | -5.007000 | -2.397000 | -1.648000 |
| H | -5.509000 | -0.970000 | -2.604000 |
| C | -3.911000 | -2.112000 | -3.473000 |
| H | -3.055000 | -2.709000 | -3.139000 |
| H | -3.557000 | -1.282000 | -4.095000 |
| H | -4.591000 | -2.743000 | -4.057000 |
| H | -2.295000 | -4.985000 | 1.659000  |
| H | -0.831000 | -5.316000 | 2.633000  |
| H | 0.831000  | -5.316000 | 2.633000  |
| H | 2.295000  | -4.985000 | 1.659000  |
| C | -2.074000 | -3.743000 | 3.392000  |
| H | -1.268000 | -3.289000 | 3.979000  |
| H | -2.653000 | -4.422000 | 4.030000  |
| H | -2.732000 | -2.957000 | 3.004000  |
| C | 2.074000  | -3.743000 | 3.392000  |
| H | 2.732000  | -2.957000 | 3.004000  |
| H | 2.653000  | -4.422000 | 4.030000  |
| H | 1.268000  | -3.289000 | 3.979000  |
| H | 2.295000  | 4.985000  | 1.659000  |
| H | 0.831000  | 5.316000  | 2.633000  |
| C | 2.074000  | 3.743000  | 3.392000  |
| H | 2.732000  | 2.957000  | 3.004000  |
| H | 1.268000  | 3.289000  | 3.979000  |
| H | 2.653000  | 4.422000  | 4.030000  |
| H | -0.831000 | 5.316000  | 2.633000  |
| H | -2.295000 | 4.985000  | 1.659000  |
| C | -2.074000 | 3.743000  | 3.392000  |
| H | -1.268000 | 3.289000  | 3.979000  |
| H | -2.732000 | 2.957000  | 3.004000  |
| H | -2.653000 | 4.422000  | 4.030000  |
| H | -4.035000 | -6.560000 | -1.030000 |
| H | -6.114000 | -6.114000 | 0.153000  |
| H | -6.492000 | -3.959000 | 1.237000  |
| H | -4.784000 | -2.197000 | 1.100000  |
| H | -2.279000 | -4.817000 | -1.150000 |
| H | -2.279000 | 4.817000  | -1.150000 |
| H | -4.035000 | 6.560000  | -1.030000 |
| H | -4.784000 | 2.197000  | 1.100000  |
| H | -6.492000 | 3.959000  | 1.237000  |
| H | -6.114000 | 6.114000  | 0.153000  |
| H | 4.784000  | 2.197000  | 1.100000  |
| H | 6.492000  | 3.959000  | 1.237000  |
| H | 6.114000  | 6.114000  | 0.153000  |
| H | 4.035000  | 6.560000  | -1.030000 |
| H | 2.279000  | 4.817000  | -1.150000 |
| H | 4.784000  | -2.197000 | 1.100000  |
| H | 6.492000  | -3.959000 | 1.237000  |
| H | 6.114000  | -6.114000 | 0.153000  |
| H | 4.035000  | -6.560000 | -1.030000 |

|    |          |           |           |
|----|----------|-----------|-----------|
| H  | 2.279000 | -4.817000 | -1.150000 |
| O  | 1.147000 | 1.667000  | 3.608000  |
| O  | 0.483000 | -0.288000 | 4.691000  |
| O  | 2.189000 | -0.308000 | 3.105000  |
| Cl | 0.919000 | 0.288000  | 3.487000  |

## **References**

- [1] O. Kahn, in *Molecular Magnetism*; VCH: New York, **1993**, pp. 9-134.
- [2] R. J. Kurland, B. R. McGarvey, *J. Magn. Reson.* **1970**, *2*, 286-301.
- [3] J. Mispelter, M. Momenteau, J. M. Lhoste, *J. Chem. Soc. Dalton.* **1981**, 1729-1734.
- [4] I. Bertini, C. Luchinat, G. Parigi in *Solution NMR of Paramagnetic Molecules*, Elsevier, Amsterdam, **2001**, pp. 1-73.
- [5] J. Mispelter, M. Momenteau, J. M. Lohoste in *Biological Magnetic Resonance, Vol. 12* (Eds.: L. J. Berliner, J. Reuben), Plenum Press, New York, **1993**, pp. 299-355.
- [6] M. Nakamura, T. Yamaguchi, Y. Ohgo, *Inorg. Chem.* **1999**, *38*, 3126-3131.
- [7] M. A. Phillippi, H. M. Goff, *J. Am. Chem. Soc.* **1982**, *104*, 6026-6034.
- [8] A. D. Boersma, H. M. Goff, *Inorg. Chem.* **1984**, *23*, 1671-1676.
- [9] P. Gans, G. Buisson, E. Duee, J. C. Marchon, B. S. Erler, W. F. Scholz, C. A. Reed, *J. Am. Chem. Soc.* **1986**, *108*, 1223-1234.
- [10] R.-J. Cheng, P.-Y. Chen, P.-R. Gau, C.-C. Chen, S.-M. Peng, *J. Am. Chem. Soc.* **1997**, *119*, 2563-2569.
- [11] M. K. Renner, K. M. Barkigia, Y. Zhang, C. J. Medforth, K. M. Smith, J. Fajer, *J. Am. Chem. Soc.* **1994**, *116*, 8582-8592.
